# Supplementary material for: A Mutant RNA Polymerase Activates the General Stress Response, Enabling Escherichia coli Adaptation to Late Prolonged Stationary Phase
Source: PubMed Central journal article supplement (PMC7160681; doi:10.1128/msphere.00092-20), 2020-04-15

● SCV  
● ZK819

ZK819:SCV

1:1

1:1000

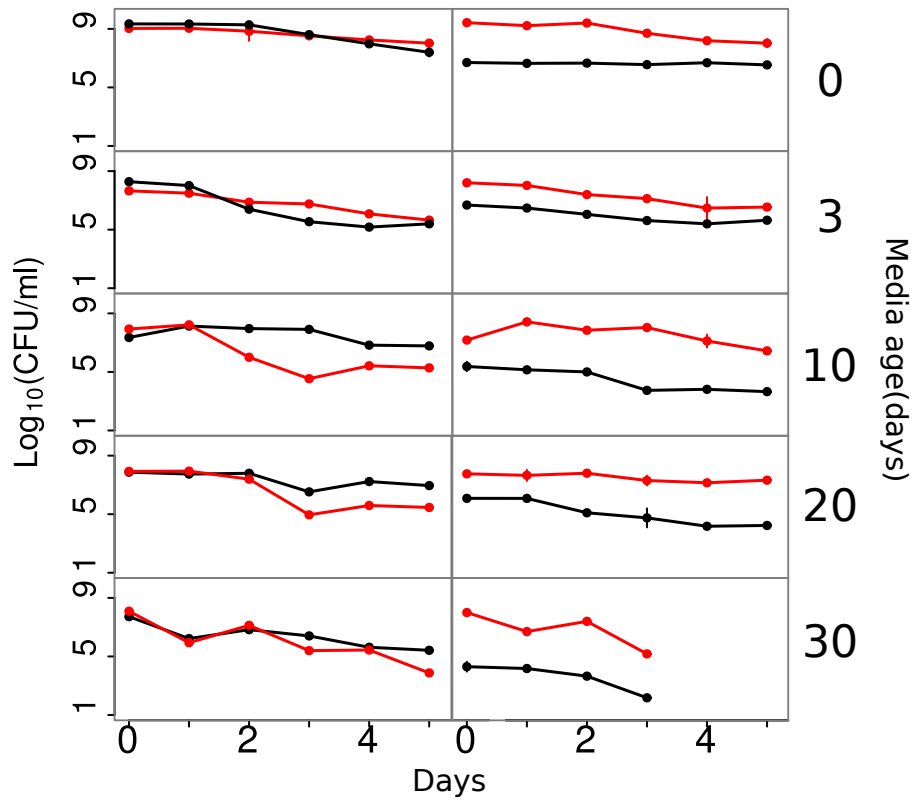

Supplement: mSphere.00092-20-sf002.pdf [file mSphere.00092-20-sf002.pdf]
