# Supplementary material for: A Mutant RNA Polymerase Activates the General Stress Response, Enabling Escherichia coli Adaptation to Late Prolonged Stationary Phase
Source: PubMed Central journal article supplement (PMC7160681; doi:10.1128/msphere.00092-20), 2020-04-15
Supplement: mSphere.00092-20-st002.pdf [file mSphere.00092-20-st002.pdf]

**Table S2 (Unique mutations in SCV strains isolated from second run of evolution in LTSP)**

| <b>Strain</b> | <b>Mutation</b>              | <b>Gene</b>                      | <b>Description</b>                                                    |
|---------------|------------------------------|----------------------------------|-----------------------------------------------------------------------|
| Strain#2      | 1. T59P<br>2. L354Q          | 1. <i>paaX</i><br>2. <i>lon</i>  | 1.DNA-binding transcriptional repressor PaaX<br>2.Lon protease        |
| Strain#8      | Insertion of 1,199bp         | <i>gatA</i>                      | Rac prophage; uncharacterized protein YdaG                            |
| Strain#10     | 1. $\Delta$ 13 bp<br>2.H164L | 1. <i>acrB</i><br>2. <i>cpdA</i> | 1.multidrug efflux pump RND permease AcrB<br>2.cAMP phosphodiesterase |
| Strain#12     | Q226*                        | <i>cpdA</i>                      | cAMP phosphodiesterase                                                |
